# Supplementary material for: Molecular Typing and Antimicrobial Susceptibility Profiles of Streptococcus uberis Isolated From Sheep Milk
Source: Preprints.org preprint supplement (doi:10.20944/preprints202111.0140.v1), 2021-11-08
Supplement: Supplementary file 1 [file supplementary]

**Supplementary Table S1.**

*Streptococcus uberis* isolates from ovine milk included in this study. Isolates were grouped by ST, corresponding to the combination of seven genes (*arc*C*, ddl,* *gki,* *rec*P, *tdk,* *tpi,* and *yqi*L). Clonal complexes (CC) are also reported for some isolates. The new alleles and ST are indicated with an asterisk.

| N° isolate | **ST** | ***arc*C** | ***ddl*** | ***gki*** | ***rec*P** | ***tdk*** | ***tpi*** | ***yqi*L** | **CC** |
| --- | --- | --- | --- | --- | --- | --- | --- | --- | --- |
| n=1 | [294](https://pubmlst.org/bigsdb?page=profileInfo&db=pubmlst_suberis_seqdef&scheme_id=1&profile_id=294) | 10 | 1 | 5 | 2 | 45 | 4 | 3 | 143 |
| n=1 | [350](https://pubmlst.org/bigsdb?page=profileInfo&db=pubmlst_suberis_seqdef&scheme_id=1&profile_id=350) | 3 | 2 | 3 | 3 | 3 | 2 | 3 | 86 |
| n=1 | [384](https://pubmlst.org/bigsdb?page=profileInfo&db=pubmlst_suberis_seqdef&scheme_id=1&profile_id=384) | 4 | 1 | 5 | 2 | 17 | 4 | 10 | 143 |
| n=1 | [386](https://pubmlst.org/bigsdb?page=profileInfo&db=pubmlst_suberis_seqdef&scheme_id=1&profile_id=386) | 1 | 2 | 3 | 2 | 1 | 1 | 35 |  |
| n=3 | [562](https://pubmlst.org/bigsdb?page=profileInfo&db=pubmlst_suberis_seqdef&scheme_id=1&profile_id=562) | 5 | 1 | 4 | 2 | 4 | 4 | 3 | 143 |
| n=4 | [808](https://pubmlst.org/bigsdb?page=profileInfo&db=pubmlst_suberis_seqdef&scheme_id=1&profile_id=808) | 3 | 1 | 3 | 2 | 3 | 4 | 3 | 143 |
| n=1 | [868](https://pubmlst.org/bigsdb?page=profileInfo&db=pubmlst_suberis_seqdef&scheme_id=1&profile_id=868) | 3 | 1 | 3 | 2 | 3 | 2 | 3 |  |
| n=1 | [910](https://pubmlst.org/bigsdb?page=profileInfo&db=pubmlst_suberis_seqdef&scheme_id=1&profile_id=910) | 3 | 58 | 41 | 2 | 3 | 4 | 3 |  |
| n=1 | [1112](https://pubmlst.org/bigsdb?page=profileInfo&db=pubmlst_suberis_seqdef&scheme_id=1&profile_id=1112) | 16 | 1 | 4 | 2 | 33 | 4 | 3 | 143 |
| n=2 | [1265](https://pubmlst.org/bigsdb?page=profileInfo&db=pubmlst_suberis_seqdef&scheme_id=1&profile_id=1265) | 3 | 41 | 4 | 2 | 3 | 1 | 10 |  |
| n=1 | [1266](https://pubmlst.org/bigsdb?page=profileInfo&db=pubmlst_suberis_seqdef&scheme_id=1&profile_id=1266) | 4 | 1 | 11 | 2 | 46 | 33 | 30 |  |
| n=1 | [1267](https://pubmlst.org/bigsdb?page=profileInfo&db=pubmlst_suberis_seqdef&scheme_id=1&profile_id=1267) | 4 | 1 | 11 | 2 | 46 | 33 | 3 |  |
| n=1 | [1268](https://pubmlst.org/bigsdb?page=profileInfo&db=pubmlst_suberis_seqdef&scheme_id=1&profile_id=1268) | 3 | 2 | 5 | 3 | 9 | 2 | 3 |  |
| n=1 | [1167*](https://pubmlst.org/bigsdb?page=profileInfo&db=pubmlst_suberis_seqdef&scheme_id=1&profile_id=1167) | 4 | 1 | 34 | 2 | 29 | 4 | 15 |  |
| n=1 | [1168*](https://pubmlst.org/bigsdb?page=profileInfo&db=pubmlst_suberis_seqdef&scheme_id=1&profile_id=1168) | 10 | 1 | 5 | 1 | 46 | 4 | 15 |  |
| n=1 | [1169*](https://pubmlst.org/bigsdb?page=profileInfo&db=pubmlst_suberis_seqdef&scheme_id=1&profile_id=1169) | 17 | 7 | 34 | 2 | 29 | 4 | 15 |  |
| n=1 | [1170*](https://pubmlst.org/bigsdb?page=profileInfo&db=pubmlst_suberis_seqdef&scheme_id=1&profile_id=1170) | 3 | 2 | 3 | 2 | 3 | 4 | 9 |  |
| n=1 | [1171*](https://pubmlst.org/bigsdb?page=profileInfo&db=pubmlst_suberis_seqdef&scheme_id=1&profile_id=1171) | 4 | 2 | 34 | 2 | 51 | 4 | 30 |  |
| n=1 | [1172*](https://pubmlst.org/bigsdb?page=profileInfo&db=pubmlst_suberis_seqdef&scheme_id=1&profile_id=1172) | 10 | 2 | 34 | 1 | 47 | 33 | 15 |  |
| n=2 | [1173*](https://pubmlst.org/bigsdb?page=profileInfo&db=pubmlst_suberis_seqdef&scheme_id=1&profile_id=1173) | 25 | 1 | 4 | 3 | 17 | 1 | 10 |  |
| n=3 | [1174*](https://pubmlst.org/bigsdb?page=profileInfo&db=pubmlst_suberis_seqdef&scheme_id=1&profile_id=1174) | 9 | 1 | 4 | 3 | 2 | 1 | 10 |  |
| n=2 | [1175*](https://pubmlst.org/bigsdb?page=profileInfo&db=pubmlst_suberis_seqdef&scheme_id=1&profile_id=1175) | 3 | 2 | 5 | 3 | 3 | 2 | 3 | 86 |
| n=3 | [1176*](https://pubmlst.org/bigsdb?page=profileInfo&db=pubmlst_suberis_seqdef&scheme_id=1&profile_id=1176) | 4 | 1 | 5 | 2 | 44 | 4 | 5 |  |
| n=4 | [1177*](https://pubmlst.org/bigsdb?page=profileInfo&db=pubmlst_suberis_seqdef&scheme_id=1&profile_id=1177) | 4 | 1 | 5 | 2 | 44 | 4 | 10 |  |
| n=1 | [1178*](https://pubmlst.org/bigsdb?page=profileInfo&db=pubmlst_suberis_seqdef&scheme_id=1&profile_id=1178) | 10 | 1 | 5 | 2 | 45 | 4 | 5 |  |
| n=1 | [1179*](https://pubmlst.org/bigsdb?page=profileInfo&db=pubmlst_suberis_seqdef&scheme_id=1&profile_id=1179) | 9 | 1 | 4 | 3 | 17 | 1 | 10 |  |
| n=1 | [1180*](https://pubmlst.org/bigsdb?page=profileInfo&db=pubmlst_suberis_seqdef&scheme_id=1&profile_id=1180) | 2 | 2 | 29 | 2 | 29 | 4 | 15 |  |
| n=1 | [1181*](https://pubmlst.org/bigsdb?page=profileInfo&db=pubmlst_suberis_seqdef&scheme_id=1&profile_id=1181) | 3 | 1 | 3 | 4 | 3 | 4 | 3 |  |
| n=3 | [1182*](https://pubmlst.org/bigsdb?page=profileInfo&db=pubmlst_suberis_seqdef&scheme_id=1&profile_id=1182) | 4 | 42 | 11 | 2 | 46 | 33 | 30 |  |
| n=1 | [1183*](https://pubmlst.org/bigsdb?page=profileInfo&db=pubmlst_suberis_seqdef&scheme_id=1&profile_id=1183) | 42 | 2 | 32 | 2 | 47 | 33 | 38 |  |
| n=1 | [1184*](https://pubmlst.org/bigsdb?page=profileInfo&db=pubmlst_suberis_seqdef&scheme_id=1&profile_id=1184) | 4 | 1 | 5 | 2 | 44 | 4 | 15 |  |
| n=1 | [1185*](https://pubmlst.org/bigsdb?page=profileInfo&db=pubmlst_suberis_seqdef&scheme_id=1&profile_id=1185) | 3 | 2 | 5 | 3 | 34 | 4 | 3 | 86 |
| n=2 | [1186*](https://pubmlst.org/bigsdb?page=profileInfo&db=pubmlst_suberis_seqdef&scheme_id=1&profile_id=1186) | 4 | 1 | 5 | 2 | 44 | 4 | 38 |  |
| n=1 | [1187*](https://pubmlst.org/bigsdb?page=profileInfo&db=pubmlst_suberis_seqdef&scheme_id=1&profile_id=1187) | 4 | 1 | 9 | 3 | 42 | 4 | 5 |  |
| n=3 | [1188*](https://pubmlst.org/bigsdb?page=profileInfo&db=pubmlst_suberis_seqdef&scheme_id=1&profile_id=1188) | 4 | 2 | 5 | 4 | 9 | 1 | 3 |  |
| n=2 | [1189*](https://pubmlst.org/bigsdb?page=profileInfo&db=pubmlst_suberis_seqdef&scheme_id=1&profile_id=1189) | 10 | 1 | 5 | 2 | 46 | 4 | 3 | 143 |
| n=1 | [1190*](https://pubmlst.org/bigsdb?page=profileInfo&db=pubmlst_suberis_seqdef&scheme_id=1&profile_id=1190) | 3 | 58 | 41 | 2 | 3 | 2 | 3 |  |
|  |  |  |  |  |  |  |  |  |  |
| N° isolate | **ST** | ***arc*C** | ***ddl*** | ***gki*** | ***rec*P** | ***tdk*** | ***tpi*** | ***yqi*L** | **CC** |
| n=1 | [1191*](https://pubmlst.org/bigsdb?page=profileInfo&db=pubmlst_suberis_seqdef&scheme_id=1&profile_id=1191) | 35 | 24 | 3 | 2 | 3 | 1 | 3 |  |
| n=4 | [1192*](https://pubmlst.org/bigsdb?page=profileInfo&db=pubmlst_suberis_seqdef&scheme_id=1&profile_id=1192) | 4 | 1 | 5 | 2 | 44 | 4 | 3 | 143 |
| n=1 | [1193*](https://pubmlst.org/bigsdb?page=profileInfo&db=pubmlst_suberis_seqdef&scheme_id=1&profile_id=1193) | 9 | 1 | 4 | 3 | 44 | 1 | 10 |  |
| n=1 | [1194*](https://pubmlst.org/bigsdb?page=profileInfo&db=pubmlst_suberis_seqdef&scheme_id=1&profile_id=1194) | 10 | 2 | 4 | 2 | 47 | 33 | 38 |  |
| n=1 | [1195*](https://pubmlst.org/bigsdb?page=profileInfo&db=pubmlst_suberis_seqdef&scheme_id=1&profile_id=1195) | 5 | 1 | 4 | 2 | 33 | 4 | 3 | 143 |
| n=2 | [1196*](https://pubmlst.org/bigsdb?page=profileInfo&db=pubmlst_suberis_seqdef&scheme_id=1&profile_id=1196) | 3 | 1 | 4 | 2 | 3 | 2 | 3 |  |
| n=1 | [1197*](https://pubmlst.org/bigsdb?page=profileInfo&db=pubmlst_suberis_seqdef&scheme_id=1&profile_id=1197) | 1 | 61 | 4 | 1 | 2 | 1 | 36 | 5 |
| n=1 | [1198*](https://pubmlst.org/bigsdb?page=profileInfo&db=pubmlst_suberis_seqdef&scheme_id=1&profile_id=1198) | 3 | 1 | 3 | 1 | 9 | 4 | 3 |  |
| n=1 | [1199*](https://pubmlst.org/bigsdb?page=profileInfo&db=pubmlst_suberis_seqdef&scheme_id=1&profile_id=1199) | 3 | 1 | 5 | 2 | 3 | 2 | 3 |  |
| n=1 | [1200*](https://pubmlst.org/bigsdb?page=profileInfo&db=pubmlst_suberis_seqdef&scheme_id=1&profile_id=1200) | 3 | 2 | 3 | 2 | 31 | 4 | 3 | 86 |
| n=1 | [1231*](https://pubmlst.org/bigsdb?page=profileInfo&db=pubmlst_suberis_seqdef&scheme_id=1&profile_id=1231) | 81* | 68* | 4 | 36* | 46 | 43* | 15 |  |
| n=2 | [1232*](https://pubmlst.org/bigsdb?page=profileInfo&db=pubmlst_suberis_seqdef&scheme_id=1&profile_id=1232) | 3 | 65* | 3 | 4 | 5 | 2 | 3 |  |
| n=1 | [1233*](https://pubmlst.org/bigsdb?page=profileInfo&db=pubmlst_suberis_seqdef&scheme_id=1&profile_id=1233) | 10 | 1 | 5 | 1 | 46 | 4 | 75* |  |
| n=1 | [1234*](https://pubmlst.org/bigsdb?page=profileInfo&db=pubmlst_suberis_seqdef&scheme_id=1&profile_id=1234) | 84* | 10 | 66* | 2 | 111* | 45* | 76* |  |
| n=1 | [1235*](https://pubmlst.org/bigsdb?page=profileInfo&db=pubmlst_suberis_seqdef&scheme_id=1&profile_id=1235) | 10 | 67* | 4 | 2 | 46 | 33 | 10 |  |
| n=2 | [1236*](https://pubmlst.org/bigsdb?page=profileInfo&db=pubmlst_suberis_seqdef&scheme_id=1&profile_id=1236) | 4 | 4 | 3 | 1 | 44 | 4 | 77* |  |
| n=2 | [1237*](https://pubmlst.org/bigsdb?page=profileInfo&db=pubmlst_suberis_seqdef&scheme_id=1&profile_id=1237) | 10 | 1 | 5 | 2 | 45 | 43* | 30 |  |
| n=1 | [1238*](https://pubmlst.org/bigsdb?page=profileInfo&db=pubmlst_suberis_seqdef&scheme_id=1&profile_id=1238) | 7 | 1 | 67* | 2 | 73 | 4 | 5 |  |
| n=1 | [1239*](https://pubmlst.org/bigsdb?page=profileInfo&db=pubmlst_suberis_seqdef&scheme_id=1&profile_id=1239) | 10 | 67* | 5 | 2 | 45 | 4 | 10 |  |
| n=2 | [1240*](https://pubmlst.org/bigsdb?page=profileInfo&db=pubmlst_suberis_seqdef&scheme_id=1&profile_id=1240) | 10 | 68* | 5 | 2 | 45 | 43* | 30 |  |
| n=1 | [1241*](https://pubmlst.org/bigsdb?page=profileInfo&db=pubmlst_suberis_seqdef&scheme_id=1&profile_id=1241) | 40 | 1 | 68* | 2 | 17 | 4 | 78* |  |
| n=3 | [1242*](https://pubmlst.org/bigsdb?page=profileInfo&db=pubmlst_suberis_seqdef&scheme_id=1&profile_id=1242) | 80* | 1 | 4 | 1 | 13 | 1 | 3 |  |
| n=1 | [1243*](https://pubmlst.org/bigsdb?page=profileInfo&db=pubmlst_suberis_seqdef&scheme_id=1&profile_id=1243) | 5 | 1 | 70 | 1 | 13 | 1 | 10 |  |
| n=2 | [1244*](https://pubmlst.org/bigsdb?page=profileInfo&db=pubmlst_suberis_seqdef&scheme_id=1&profile_id=1244) | 3 | 2 | 3 | 2 | 110* | 2 | 3 |  |
| n=1 | [1245*](https://pubmlst.org/bigsdb?page=profileInfo&db=pubmlst_suberis_seqdef&scheme_id=1&profile_id=1245) | 21 | 4 | 63 | 2 | 10 | 43* | 15 |  |
| n=1 | [1246*](https://pubmlst.org/bigsdb?page=profileInfo&db=pubmlst_suberis_seqdef&scheme_id=1&profile_id=1246) | 81* | 10 | 3 | 2 | 112* | 7 | 38 |  |
| n=4 | [1247*](https://pubmlst.org/bigsdb?page=profileInfo&db=pubmlst_suberis_seqdef&scheme_id=1&profile_id=1247) | 42 | 10 | 70* | 2 | 111 | 4 | 27 |  |
| n=1 | [1248*](https://pubmlst.org/bigsdb?page=profileInfo&db=pubmlst_suberis_seqdef&scheme_id=1&profile_id=1248) | 21 | 2 | 63 | 2 | 6 | 43* | 15 |  |
| n=1 | [1249*](https://pubmlst.org/bigsdb?page=profileInfo&db=pubmlst_suberis_seqdef&scheme_id=1&profile_id=1249) | 4 | 1 | 16 | 1 | 13 | 4 | 81* |  |
| n=1 | [1250*](https://pubmlst.org/bigsdb?page=profileInfo&db=pubmlst_suberis_seqdef&scheme_id=1&profile_id=1250) | 82* | 1 | 5 | 2 | 45 | 4 | 38 |  |
| n=2 | [1251*](https://pubmlst.org/bigsdb?page=profileInfo&db=pubmlst_suberis_seqdef&scheme_id=1&profile_id=1251) | 42 | 67* | 4 | 2 | 46 | 33 | 30 |  |
| n=1 | [1252*](https://pubmlst.org/bigsdb?page=profileInfo&db=pubmlst_suberis_seqdef&scheme_id=1&profile_id=1252) | 3 | 1 | 5 | 2 | 112* | 7 | 5 |  |
| n=1 | [1253*](https://pubmlst.org/bigsdb?page=profileInfo&db=pubmlst_suberis_seqdef&scheme_id=1&profile_id=1253) | 10 | 67* | 4 | 1 | 46 | 4 | 33 |  |
| n=1 | [1254*](https://pubmlst.org/bigsdb?page=profileInfo&db=pubmlst_suberis_seqdef&scheme_id=1&profile_id=1254) | 42 | 10 | 70* | 2 | 29 | 4 | 27 |  |
| n=2 | [1255*](https://pubmlst.org/bigsdb?page=profileInfo&db=pubmlst_suberis_seqdef&scheme_id=1&profile_id=1255) | 4 | 67* | 32 | 2 | 46 | 4 | 38 |  |
| n=2 | [1256*](https://pubmlst.org/bigsdb?page=profileInfo&db=pubmlst_suberis_seqdef&scheme_id=1&profile_id=1256) | 81* | 10 | 3 | 2 | 115* | 4 | 15 |  |
| n=1 | [1257*](https://pubmlst.org/bigsdb?page=profileInfo&db=pubmlst_suberis_seqdef&scheme_id=1&profile_id=1257) | 3 | 1 | 5 | 2 | 112* | 7 | 62 |  |
| n=1 | [1258*](https://pubmlst.org/bigsdb?page=profileInfo&db=pubmlst_suberis_seqdef&scheme_id=1&profile_id=1258) | 83* | 10 | 70* | 2 | 111* | 4 | 27 |  |
| n=1 | [1259*](https://pubmlst.org/bigsdb?page=profileInfo&db=pubmlst_suberis_seqdef&scheme_id=1&profile_id=1259) | 10 | 68* | 6 | 2 | 45 | 43* | 30 |  |
| n=1 | [1260*](https://pubmlst.org/bigsdb?page=profileInfo&db=pubmlst_suberis_seqdef&scheme_id=1&profile_id=1260) | 4 | 68* | 69* | 2 | 116* | 43* | 30 |  |
| n=1 | [1261*](https://pubmlst.org/bigsdb?page=profileInfo&db=pubmlst_suberis_seqdef&scheme_id=1&profile_id=1261) | 9 | 1 | 4 | 3 | 113* | 1 | 10 |  |
| n=1 | [1262*](https://pubmlst.org/bigsdb?page=profileInfo&db=pubmlst_suberis_seqdef&scheme_id=1&profile_id=1262) | 10 | 67* | 4 | 1 | 46 | 4 | 79* |  |
| n=1 | [1263*](https://pubmlst.org/bigsdb?page=profileInfo&db=pubmlst_suberis_seqdef&scheme_id=1&profile_id=1263) | 2 | 1 | 4 | 2 | 114* | 4 | 34 |  |
|  |  |  |  |  |  |  |  |  |  |
| N° isolate | **ST** | ***arc*C** | ***ddl*** | ***gki*** | ***rec*P** | ***tdk*** | ***tpi*** | ***yqi*L** | **CC** |
| n=1 | [1264*](https://pubmlst.org/bigsdb?page=profileInfo&db=pubmlst_suberis_seqdef&scheme_id=1&profile_id=1264) | 40 | 10 | 69* | 36* | 115* | 44* | 80* |  |
| n=1 | [1284*](https://pubmlst.org/bigsdb?page=profileInfo&db=pubmlst_suberis_seqdef&scheme_id=1&profile_id=1284) | 71 | 1 | 3 | 1 | 54 | 2 | 3 |  |
| n=1 | [1285*](https://pubmlst.org/bigsdb?page=profileInfo&db=pubmlst_suberis_seqdef&scheme_id=1&profile_id=1285) | 81* | 30 | 30 | 1 | 115* | 47* | 38 |  |
| n=1 | [1286*](https://pubmlst.org/bigsdb?page=profileInfo&db=pubmlst_suberis_seqdef&scheme_id=1&profile_id=1286) | 85* | 66* | 5 | 37* | 109* | 7 | 5 |  |
| n=1 | [1287*](https://pubmlst.org/bigsdb?page=profileInfo&db=pubmlst_suberis_seqdef&scheme_id=1&profile_id=1287) | 81* | 68* | 4 | 36* | 118* | 43* | 15 |  |
| n=1 | [1288*](https://pubmlst.org/bigsdb?page=profileInfo&db=pubmlst_suberis_seqdef&scheme_id=1&profile_id=1288) | 2 | 2 | 69* | 2 | 119* | 4 | 10 |  |

**Supplementary Table S2**. Distribution of Sequence Types (STs) within the three defined Clonal Complex (CC)

| N° isolate | ST | CC |
| --- | --- | --- |
| 1089 | 294 | 143 |
| 1107 | 384 | 143 |
| 1886 | 562 | 143 |
| 2210 | 562 | 143 |
| 2362 | 562 | 143 |
| 2457 | 808 | 143 |
| 2679 | 808 | 143 |
| 2717 | 808 | 143 |
| 2743 | 808 | 143 |
| 2864 | 1112 | 143 |
| 2900 | 1189 | 143 |
| 3021 | 1189 | 143 |
| 3024 | 1192 | 143 |
| 3027 | 1192 | 143 |
| 3046 | 1192 | 143 |
| 3152 | 1192 | 143 |
| 3213 | 1195 | 143 |
| 3257 | 350 | 86 |
| 3295 | 1175 | 86 |
| 3303 | 1175 | 86 |
| 3308 | 1185 | 86 |
| 3383 | 1200 | 86 |
| 3464 | 1197 | 5 |

**Supplementary Table S3**. Primer sequences for resistance genes and PCR conditions.

| **Target Gene** | **Nucleotide sequence**  **(5'-3')** | **Annealing**  **Temperature (°C)** | **Amplicon size (bp)** | **Reference** |
| --- | --- | --- | --- | --- |
| *aad*-6 | AGAAGATGTAATAATATAG | 37 | 978 | [31] |
| CTGTAATCACTGTTCCCGCCT |
| *aph*A-3’ | GGGGTACCTTTAAATACTGTAG | 50 | 848 | [32] |
| TCTGGATCCTAAAACAATTCATCC |
| *bla*Z | AAGAGATTTGCCTATGCTTC | 45 | 517 | [33] |
| GCTTGACCACTTTTATCAGC |
| *erm*A | AAGCGGTAAACCCCTCTGAG | 58 | 440 | [34] |
| TCAAAGCCTGTCGGAATTGG |
| *erm*B | CATTTAACGACGAAACTGGC | 58 | 424 | [34] |
| GGAACATCTGTGGTATGGCG |
| *erm*C | ATCTTTGAAATCGGCTCAGG | 58 | 294 | [34] |
| CAAACCCGTATTCCACGATT |
| *erm*TR | ATAGAAATTGGGTCAGGAAAAGG | 48 | 376 | [35] |
| CCCTGTTTACCCATTTATAAACG |
| *mef*A | AGTATCATTAATCACTAGTGC | 45 | 500 | [35] |
| TTCTTCTGGTACTAAAAGTGG |
| *tet*O | AACTTAGGCATTCTGGCTCAC | 50 | 515 | [36] |
| TCCCACTGTTCCATATCGTCA |
| *tet*L | CATTTGGTCTTATTGGATCG | 54 | 456 | [37] |
| ATTACACTTCCGATTTCGG |
| *tet*M | GTTAAATAGTGTTCTTGGAG | 52 | 576 | [37] |
| CTAAGATATGGCTCTAACAA |
| tetK | GTAGCGACAATAGGTAATAGT | 55 | 360 | [36] |
| GTAGTGACAATAAACCTCCTA |
| *tet*S | CATAGACAAGCCGTTGACC | 48 | 667 | [38] |
| ATGTTTTTGGAACGCCAGAG |
